# Supplementary material for: Should seasonal rainfall forecasts be used for flood preparedness?
Source: Copernicus journal article supplement (doi:10.5194/hess-21-4517-2017), 2017-09-11
Supplement: Supplementary file 1 [file hess-21-4517-2017-supplement.pdf]

Supplement of Hydrol. Earth Syst. Sci., 21, 4517–4524, 2017  
<https://doi.org/10.5194/hess-21-4517-2017-supplement>  
© Author(s) 2017. This work is distributed under  
the Creative Commons Attribution 3.0 License.

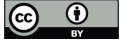

*Supplement of*

## **Should seasonal rainfall forecasts be used for flood preparedness?**

**E. Coughlan de Perez et al.**

*Correspondence to:* Erin Coughlan de Perez ([coughlan.erin@gmail.com](mailto:coughlan.erin@gmail.com))

The copyright of individual parts of the supplement might differ from the CC BY 3.0 License.

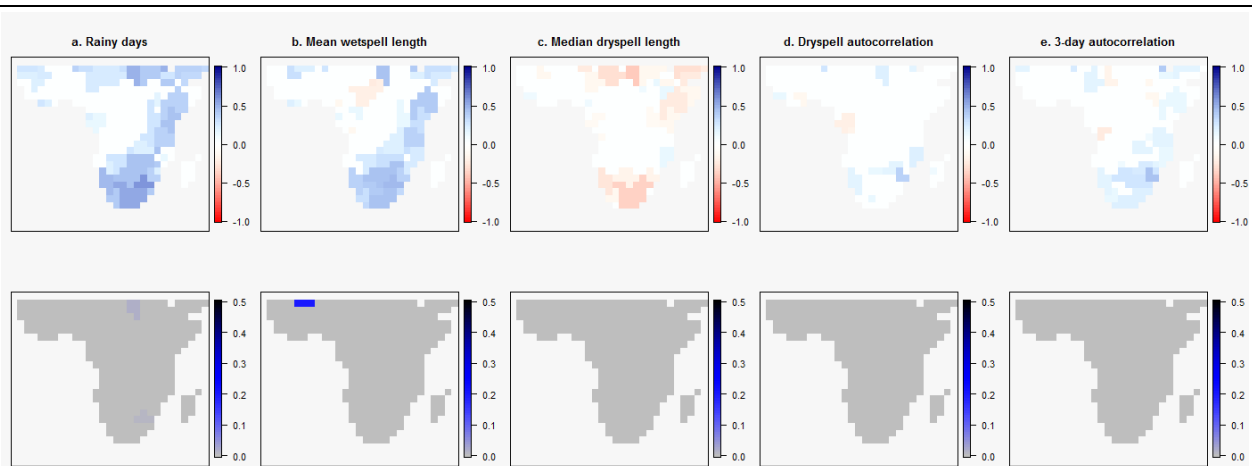

Figure S1: Same as figure 2 for the following variables (a) Rainy days: number of days with more than 1mm of rain (b) Mean wetspell length: mean length of consecutive days of rain greater than 1mm, (c) Median dryspell length: median length of consecutive dry days, (d) Dryspell autocorrelation: Spearman rank lag-1 autocorrelation of successive dry spell lengths, (e) 3-day autocorrelation: Spearman rank lag-3 autocorrelation of daily rainfall amounts.

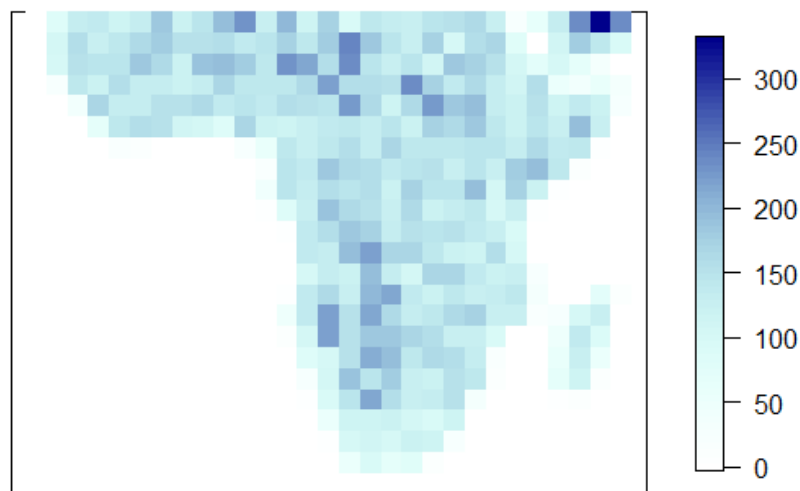

Figure S2: Number of GloFAS river pixels greater than 1000km<sup>2</sup> of upstream area, per 2.5 degree gridbox.
